# Supplementary material
Source: ML conference proceedings conference paper supplement (https://openreview.net/forum?id=Vd5JXiX073)
Supplement: supplementary_material [file Appendix.pdf › Appendix.pdf]

## Appendices

|     |                                                                 |           |
|-----|-----------------------------------------------------------------|-----------|
| 749 | <b>A Related Works</b>                                          | <b>18</b> |
| 750 | A.1 KG-RAG Methods . . . . .                                    | 18        |
| 751 | A.2 KGQA Benchmarks. . . . .                                    | 19        |
| 752 | <b>B KGQA Datasets and Inspection Protocol</b>                  | <b>20</b> |
| 753 | B.1 Basic Dataset Statistic . . . . .                           | 20        |
| 754 | B.2 Recent KG-RAG Publications with WebQSP and/or CWQ . . . . . | 21        |
| 755 | B.3 Manual Inspection Protocol . . . . .                        | 21        |
| 756 | <b>C Pitfalls of Existing KGQA Benchmarks</b>                   | <b>22</b> |
| 757 | C.1 Current KGQA Dataset Issues . . . . .                       | 23        |
| 758 | C.2 Limitations of Exact-Match Evaluation . . . . .             | 26        |
| 759 | <b>D Prompt Templates and Generation Examples</b>               | <b>27</b> |
| 760 | D.1 Question Generation Prompt . . . . .                        | 27        |
| 761 | D.2 SPARQL Validation Prompt . . . . .                          | 29        |
| 762 | <b>E A Case Study of KGQAGen-10k</b>                            | <b>30</b> |
| 763 | <b>F Experimental Details</b>                                   | <b>33</b> |
| 764 | F.1 Model Specifications . . . . .                              | 33        |
| 765 | F.2 Beyond Exact Match: Introducing LASM . . . . .              | 34        |
| 766 | F.3 Experimental Setup . . . . .                                | 34        |

### 767 A Related Works

768 This section provides comprehensive technical details and broader context for the related work  
769 summarized in Section 2 focusing on the methodological foundations and evaluation challenges that  
770 motivate our framework.

#### 771 A.1 KG-RAG Methods.

772 Knowledge graph-based retrieval-augmented generation systems address hallucination and factual  
773 grounding limitations in large language models by integrating structured symbolic knowledge into  
774 the generation process. These systems retrieve relevant subgraphs based on input queries to serve  
775 as structured context, effectively combining broad parametric knowledge with the precision and  
776 verifiability of knowledge bases.

777 Recent developments have produced several distinct architectural approaches addressing different  
778 aspects of the integration challenge. Graph-guided reasoning methods, exemplified by Reasoning-on-  
779 Graph (RoG) [32], enable interpretable multi-step reasoning by having language models explicitly  
780 verbalize their traversal through knowledge graph structures, generating relation paths that are then  
781 grounded in actual graph connections. This approach provides both answer generation and explanation  
782 capabilities, making the reasoning process more transparent and debuggable. Extensions include  
783 GNN-RAG [35], which incorporates graph neural networks to better capture structural patterns  
784 in retrieved subgraphs. In contrast, constrained generation approaches like Graph-Constrained

Reasoning (GCR) [33] focus on ensuring faithful outputs by incorporating explicit graph-based constraints into the decoding process, using KG-Trie structures to restrict generation to only those paths that exist in the knowledge base.

Modular and memory-augmented architectures represent another important direction. Frameworks like FRAG [18] propose adaptive combinations of different retrieval and generation components, while Generate-on-Graph [69] treats the language model as both an agent and a knowledge graph component, enabling interactive knowledge graph expansion during question answering. Memory-augmented approaches such as MemQ [68] introduce dedicated memory modules that separate language model reasoning from knowledge graph tool usage. More sophisticated integration strategies include DeCAF [71], which jointly generates natural language answers and corresponding logical forms, and ReknoS [64], which introduces abstract relationship reasoning through super-relations for complex compositional queries.

## A.2 KGQA Benchmarks.

Despite major progress in KGQA dataset construction, existing benchmarks exhibit persistent limitations that hinder effective evaluation of modern KG-augmented retrieval systems. Early human-curated datasets such as WebQuestions [6] and ComplexQuestions [5] focused on capturing authentic user queries and introducing compositional constraints, but these resources are dominated by simple factoid questions or contain ambiguities and incomplete annotations, making them insufficient for testing models that require deeper reasoning and precise answer grounding.

To address these shortcomings, semi-automated and automated approaches have become prevalent. Hybrid pipelines like LC-QuAD [60, 14] and GraphQuestions [52] use SPARQL templates and graph-structured logic to guide question generation, with subsequent human editing for naturalness. While this increases structural diversity and complexity, the template-based nature often leads to unnatural or overly constrained question styles. More recent fully automated frameworks, including Maestro [41], CHATTY-Gen [38], and DYNAMIC-KGQA [10], attempt to scale question generation via rules, popularity heuristics, or dialogue simulation, yet these methods still struggle to balance natural language fluency, logical completeness, and answer correctness for challenging multi-hop or compositional queries.

The evolution of KGQA benchmarks reflects the field’s growing complexity, progressing from simple factoid questions to sophisticated multi-hop reasoning scenarios. Early benchmarks established foundational paradigms: WebQuestions pioneered collecting natural language questions through search engine suggestions with human annotation, WebQuestionsSP [70] added SPARQL annotations aligned with Freebase, and ComplexWebQuestions [56] advanced complexity by programmatically generating SPARQL queries with logical constructs. However, these early datasets relied heavily on Freebase, which ceased maintenance in 2016, motivating migration efforts to more sustainable knowledge bases like DBpedia and Wikidata, though such migrations often introduced conceptual mismatches and alignment difficulties. Specialized evaluation objectives drove targeted benchmark development. GrailQA [20] introduced systematic evaluation of generalization scenarios including i.i.d., compositional, and zero-shot settings, while KQAPro [8] emphasized compositional reasoning through explicit program annotations and MetaQA [76] focused on multi-hop reasoning using controlled movie domain knowledge graphs. Conversational benchmarks like CSQA [49] introduced multi-turn dialogue structures, and recent work incorporated dialogue-style questions with coreference and ellipsis to better reflect real-world query patterns. Meanwhile, evaluation methodology improvements from CBench [42] and SmartBench [40] provided comprehensive analysis of SPARQL query complexity and linguistic diversity.

Despite these varied approaches, our systematic audit reveals that annotation quality remains a persistent challenge across benchmarks, with even widely-used datasets like WebQSP and CWQ exhibiting correctness rates below 60 percent. Furthermore, the predominant reliance on exact-match evaluation metrics fails to capture semantic equivalence, leading to systematic underestimation of model capabilities and underscoring the need for more rigorous benchmark construction methodologies that prioritize both annotation accuracy and semantically-aware evaluation protocols.

## B KGQA Datasets and Inspection Protocol

### B.1 Basic Dataset Statistic

This section provides additional context for the dataset analysis presented in Section 3, reviewing existing KGQA benchmarks and their construction methodologies. We categorize these datasets based on their generation approaches and underlying knowledge bases. These datasets differ in construction methods (manual vs. automated), target knowledge graphs (Freebase [7], DBpedia [3], Wikidata [61], YAGO [53]), and reasoning complexity. Some emphasize compositional or multi-hop reasoning, while others focus on multilingual support, dialogue capabilities, or logical form mapping. Our review examines these datasets to understand their construction approaches, key features, and relevance for evaluating knowledge graph-enhanced question answering systems.

**GraphQuestions** [52] is constructed through a semi-automated pipeline that begins with the generation of structured queries over Freebase. These queries are designed to capture varied reasoning functions such as counting, superlatives, and conjunctions, as well as different structural complexities and answer cardinalities. Queries that are infrequent or low-quality are filtered using web statistics. The remaining set is then verbalized into natural language using pre-defined templates, creating a dataset well-suited for evaluating semantic parsing and logical compositionality.

**WebQuestionsSP** [70] builds upon the WebQuestions [6] dataset by providing SPARQL annotations aligned with Freebase. It employs a modular annotation interface that guides workers to select topic entities, predicates, and relevant constraints, ensuring consistent semantic representation. The dataset offers executable queries, enabling precise evaluation of models' ability to map natural language questions to structured representations.

**ComplexWebQuestions** [56] extends WebQuestionsSP by programmatically generating more complex SPARQL queries that incorporate logical constructs such as conjunctions, comparatives, and superlatives. These queries are automatically translated into machine-generated questions, which are then paraphrased into natural language by crowdworkers. The resulting dataset challenges QA models with deeper compositional reasoning and varied surface forms.

**QALD-9** [37] is a multilingual benchmark constructed through manual curation, where annotators write natural language questions and align them with SPARQL queries over DBpedia. It emphasizes diversity in question types and supports multiple languages. Its extension, QALD-9-Plus, translates these questions into additional languages and maps them to Wikidata, enabling cross-lingual and cross-knowledge-base evaluation.

**MetaQA** [76] frames question answering as a latent variable problem, where both the topic entity and the reasoning path are unobserved. Built over a movie-related knowledge graph, the dataset includes 1-hop, 2-hop, and 3-hop questions, designed to evaluate multi-step reasoning. A variational neural framework is used to learn both entity disambiguation and graph-based reasoning simultaneously.

**SimpleDBpediaQA** [4] remaps the widely used SimpleQuestions dataset from Freebase to DBpedia. This conversion involves aligning entities and predicates via owl:sameAs links and rewriting SPARQL queries to account for conceptual mismatches such as directionality, ambiguity, and redirections. The resulting dataset enables QA over an actively maintained knowledge base while preserving the simplicity of the original benchmark.

**CSQA** [49] introduces a large-scale, multi-turn dialogue dataset for complex question answering over Wikidata. It combines crowd-sourced and in-house annotations to generate over 200K question-answer pairs, including clarification, comparison, and logical reasoning within dialogue context. CSQA is designed to benchmark conversational agents that require memory and contextual understanding.

**LC-QuAD 1.0 and 2.0** [60, 14] are created through a three-stage semi-automated pipeline. First, SPARQL queries are instantiated using templates and selected entities. Second, these queries are mapped to question templates. Finally, crowdworkers paraphrase them into fluent natural language. The datasets support a wide range of question types, including boolean, temporal, compositional, and multi-relation queries, and target DBpedia and Wikidata respectively.

**FreeBaseQA** [23] compiles trivia-style factoid question-answer pairs from public sources and aligns them with Freebase triples using a two-way entity linking approach. Human annotators then validate

relevance and correctness. The dataset features over 54K entity-answer pairs covering 28K unique natural questions, offering high linguistic diversity and a challenging alternative to SimpleQuestions.

**Compositional Freebase Questions** [25] is developed to assess compositional generalization. It begins by generating logical forms and corresponding SPARQL queries using a unified grammar. Natural questions are written to express these logical forms. The dataset is then split using a divergence-based strategy to maximize the gap in compositional structure between training and test sets, enabling rigorous evaluation of generalization.

**GrailQA** [20] constructs question-answer pairs through a structured pipeline involving logical form generation over Freebase, expert-written canonical questions, and crowd-sourced paraphrases. It includes three evaluation splits: i.i.d., compositional, and zero-shot, making it suitable for analyzing generalization across different reasoning complexities and linguistic expressions.

**QALD-9 Plus** [46] enhances QALD-9 by adding more questions, refining SPARQL annotations, and expanding multilingual support. The updated version improves coverage of complex queries and diverse linguistic phenomena, making it more suitable for modern multilingual QA systems.

**KQA Pro** [8] is constructed by generating compositional reasoning programs (KoPL) and corresponding SPARQL queries over a curated knowledge base. These are paraphrased into natural questions via crowdsourcing. The dataset supports fine-grained evaluation across logical reasoning categories such as multi-hop inference, comparison, boolean logic, and temporal constraints.

**Dynamic-KGQA** [10] departs from static benchmarks by generating question-answer pairs on-the-fly. It samples compact, semantically coherent subgraphs from YAGO 4.5 [53] and uses LLMs to produce multi-hop questions grounded in these subgraphs. This design minimizes data leakage and supports controlled, reproducible QA benchmarking with adaptive complexity.

## 910 B.2 Recent KG-RAG Publications with WebQSP and/or CWQ

WebQSP [70] and CWQ [56] have emerged as the primary benchmarks for empirical evaluation in LLM-based knowledge graph question answering. Table 3 presents a chronological summary of recent LLM-based KGQA models, indicating for each whether WebQSP and CWQ were used for evaluation and providing a brief description of the model’s main approach. Notably, nearly 30 KG-ARG models released between 2023 and 2025 have adopted one or both datasets as central components of their experimental protocols, despite the quality issues identified in Section 3.

Early LLM-KG hybrids, including ReaRev [34] and DECAF [71], set a precedent by reporting results on both datasets, but typically focused on Hit@1 as the main metric. As the field progressed, it became clear that Hit@1 alone could obscure over-generation and other qualitative issues. This recognition prompted a shift in the community: subsequent agent-style models such as ToG [55], RoG [32], ChatKBQA [31], and KD-CoT [63] began to report full precision, recall, and F1 scores on both benchmarks, enabling more nuanced and meaningful comparison. By 2024 and 2025, evaluation on WebQSP and CWQ had become an established standard for the field. State-of-the-art systems—such as GCR [33], Effi-QA [13], GNN-RAG [35], PoG [9], CLEAR-KGQA [65], and ReKnoS [64]—universally benchmarked on these datasets before extending to additional corpora or domain-specific tasks. Even in research targeting specialised knowledge graphs, models like RARoK [72] and Efficient-G-Retriever [51] included WebQSP or CWQ for calibration and comparability. As captured in Table 3 the adoption trajectory of these datasets not only reflects their ubiquity but also highlights their role in shaping rigorous and transparent evaluation practices for the next generation of KGQA systems.

## 931 B.3 Manual Inspection Protocol

We evaluate a broad selection of prominent KGQA benchmarks, including , and others commonly used in recent KGQA literature. Each dataset provides a set of natural language questions paired with ground-truth answers, and, where available, supporting triples or subgraphs from the underlying knowledge graph (e.g., Freebase, Wikidata, DBpedia, WikiMovies and some subsets).

For our systematic audit, we followed a unified sampling and review protocol. For WebQSP and CWQ—the most widely adopted benchmarks—we randomly sampled 100 and 300 test examples, respectively, to ensure sufficient coverage of prevalent error types. For all other datasets, we

Table 3: Chronological summary of recent LLM-based KGQA models, with dataset usage based on reported experiments (✓).

| Author [Citation]      | Model                 | WebQSP | CWQ | Year | Short Introduction                                                        |
|------------------------|-----------------------|--------|-----|------|---------------------------------------------------------------------------|
| Mavromatis et al. [34] | ReaRev                | ✓      | ✓   | 2022 | LLM + GNNs refine reasoning on incomplete graphs.                         |
| Yu et al. [71]         | DECAF                 | ✓      | ✓   | 2022 | Joint answer/logical form decoding from free-text retrieval.              |
| Sun et al. [55]        | ToG                   | ✓      | ✓   | 2023 | LLM agent explores KGs via beam search for deep, interpretable reasoning. |
| Luo et al. [32]        | RoG                   | ✓      | ✓   | 2023 | Relation-grounded KG paths guide LLM reasoning with explanations.         |
| Luo et al. [31]        | ChatKBQA              | ✓      | ✓   | 2023 | LLM-generated logical forms, improved with KG retrieval.                  |
| Wang et al. [63]       | KD-CoT                | ✓      | ✓   | 2023 | External KG knowledge injected into CoT reasoning.                        |
| Liu et al. [30]        | DualR                 | ✓      | ✓   | 2024 | GNN for structural reasoning, frozen LLM for semantic reasoning.          |
| Luo et al. [33]        | GCR                   | ✓      | ✓   | 2024 | KG-Trie constrains LLM decoding for logic-faithful KG reasoning.          |
| Dong et al. [13]       | Effi-QA               | ✓      | ✓   | 2024 | Iterative LLM planning, KG exploration, and self-reflection for QA.       |
| Mavromatis et al. [35] | GNN-RAG               | ✓      | ✓   | 2024 | GNN-based subgraph reasoning with LLM in RAG pipeline.                    |
| Xu et al. [67]         | READS                 | ✓      | ✓   | 2024 | LLM decomposes KGQA into retrieval, pruning, inference.                   |
| Li et al. [26]         | DoG                   | ✓      | ✓   | 2024 | LLM generates “well-formed chains” via constrained decoding.              |
| Fang et al. [17]       | KARPA                 | ✓      | ✓   | 2024 | LLM pre-plans, matches KG paths, reasons in training-free manner.         |
| Xu et al. [69]         | GoG                   | ✓      | ✓   | 2024 | LLM agent selects, generates, reasons on incomplete KGs.                  |
| Zhan et al. [72]       | RARoK                 | ✓      | ✓   | 2024 | RAG-augmented CoT for complex medical KGQA.                               |
| Li et al. [27]         | SubgraphRAG           | ✓      | ✓   | 2024 | MLP + triple-scoring for efficient subgraph extraction.                   |
| Fang et al. [16]       | DARA                  | ✓      |     | 2024 | LLM decomposes and grounds formal KG queries.                             |
| Hu et al. [22]         | GRAG                  | ✓      |     | 2024 | Text-to-graph, retrieves/prunes subgraphs for RAG.                        |
| Xiong et al. [66]      | Interactive-KBQA      | ✓      | ✓   | 2024 | LLM agent generates SPARQL via multi-turn KB interaction.                 |
| Dehghan et al. [12]    | EWEK-QA               | ✓      | ✓   | 2024 | Web retrieval + KG triple extraction for citation-based QA.               |
| Chen et al. [9]        | PoG                   | ✓      | ✓   | 2024 | Self-correcting LLM planner for decomposed KGQA.                          |
| Wen et al. [65]        | CLEAR-KGQA            | ✓      | ✓   | 2025 | Interactive clarification and Bayesian inference for ambiguity.           |
| Tan et al. [57]        | Path-Over-Graphs      | ✓      | ✓   | 2025 | LLM agent explores/prunes multi-hop KG paths.                             |
| Wang et al. [64]       | ReKnoS                | ✓      | ✓   | 2025 | Aggregates “super-relations” for LLM forward/backward reasoning.          |
| Xu et al. [68]         | MemQ                  | ✓      | ✓   | 2025 | Memory module separates LLM reasoning from KG tool use.                   |
| Gao et al. [18]        | FRAG                  | ✓      | ✓   | 2025 | Modular KG-RAG adapts retrieval to query complexity.                      |
| Shen et al. [50]       | RwT                   | ✓      | ✓   | 2025 | LLM-guided MCTS refines KG reasoning chains.                              |
| Solanki et al. [51]    | Efficient-G-Retriever | ✓      |     | 2025 | Attention-based subgraph retriever for LLM-aligned RAG.                   |
| Tang et al. [58]       | GGI-MAB               | ✓      | ✓   | 2025 | Multi-armed bandit adapts RAG retrieval for KGQA.                         |
| Zhang et al. [75]      | TrustUGA              | ✓      |     | 2025 | Unified Condition Graph, two-level LLM querying.                          |

sampled 60 examples per set to enable a balanced cross-dataset comparison. Each sampled item was independently reviewed by two annotators with KGQA expertise, resolving disagreements through discussion.

During inspection, we assessed each example along three main dimensions: (1) factual correctness of the annotated answer; (2) clarity and appropriateness of the question; and (3) faithfulness of the supporting SPARQL, where available. We flagged instances with incorrect, incomplete, or ambiguous annotations, as well as questions that were underspecified, trivial, or unanswerable.

## C Pitfalls of Existing KGQA Benchmarks

Many benchmarks are anchored to deprecated resources like Freebase, and even migration efforts to Wikidata [44] introduce further inconsistencies in entity mappings and answer verification. Most critically, almost all existing datasets are evaluated using rigid exact match (EM) metrics, which fail to recognize semantically equivalent answers phrased differently. In summary, current KGQA datasets



face two central challenges: (1) data quality issues, including inaccurate, incomplete, or artificial annotations, and (2) narrow evaluation protocols that do not capture true semantic correctness. These limitations underscore the need for new benchmarks—such as KGQAGen—that emphasize both annotation quality and robust, semantically-aware evaluation.

## C.1 Current KGQA Dataset Issues

This appendix presents a detailed case study of data quality issues involved the most widely used KGQA benchmarks, drawing from our broader review of 16 major datasets. For each dataset, we randomly sampled question-answer pairs and performed careful manual verification following the evaluation criteria in Section B. By presenting both problematic examples and the reasoning behind their classification, this analysis provides concrete, case-based evidence that complements the aggregate statistics reported in Table 1 and discussed in Section 3.

Our review identifies three principal categories of data quality problems, as defined in Section 3.1: **Inaccurate Ground Truth Answers**, **Low-Quality or Ambiguous Questions**, and **Limitations of Exact-Match Evaluation**. These recurring issues—rooted in annotation, question design, and evaluation protocols—can seriously undermine the reliability of KGQA benchmarks. A comprehensive breakdown, along with additional annotated examples for each dataset, is provided in the supplementary materials at the shared repository<sup>5</sup>.

### C.1.1 Inaccurate Ground Truth Answers

Following the categorization presented in Section 3, we provide additional examples for each type of answer annotation error identified in our analysis: A major challenge in KGQA benchmarks is the prevalence of ground truth annotation errors, including incorrect, incomplete, or outdated answers. These undermine evaluation reliability and can mislead model training.

**Incorrect annotations.** Incorrect annotations occur when the labeled answer does not actually address the question or contains factual mistakes.

- **ID: WebQTest-273**  
**Question:** When did Michael Jordan return to the NBA?  
**Answer:** 1984  
**Issue:** 1984 is the year of his NBA debut, not his return. The correct answer should be 1995.
- **ID: CWQ-848\_ac67410188d0f2258139a3c84773885e**  
**Question:** What is the time zone in the location where the time zone is Central Western?  
**Answer:** Parliamentary system, Constitutional monarchy, Federal monarchy  
**Issue:** The answers are not time zones but forms of government. This is an incorrect annotation, and the question is self-answering and non-informative.
- **ID: QALD9Plus-120**  
**Question:** Who is the daughter of Bill Clinton married to?  
**Answer:** Chelsea Clinton  
**Issue:** Answer is Chelsea Clinton herself, not her spouse. The correct answer should be Marc Mezvinsky.
- **ID: GrailQA-2101221015000**  
**Question:** The 1912–13 Scottish Cup season is part of what sports league championship?  
**Answer:** 1913 Scottish Cup Final  
**Issue:** The answer refers to a final match, not the correct league entity (“Scottish Cup”).
- **ID: DynamicKGQA-26720**  
**Question:** Which actor starred in both ‘The Hospital’ and was born in the same country as Albert Einstein?  
**Answer:** George C. Scott  
**Issue:** George C. Scott was born in the United States, while Einstein was born in Germany. The answer does not satisfy the nationality constraint.

<sup>5</sup>[https://drive.google.com/drive/folders/1hH-NxqbUk0SeLC3q1ifLpq6i01Byait4?usp=drive\\_link](https://drive.google.com/drive/folders/1hH-NxqbUk0SeLC3q1ifLpq6i01Byait4?usp=drive_link)

999 **Outdated answers.** Outdated answers reflect facts that were once correct but have become obsolete  
1000 due to real-world changes and key issue is the outdated knowledge source.

- 1001 • **ID: WebQTest-182**  
1002 **Question:** Who is Khloe Kardashian's husband?  
1003 **Answer:** Lamar Odom  
1004 **Issue:** The answer is outdated; Khloe Kardashian and Lamar Odom divorced in 2016.
- 1005 • **ID: KQAPro-14**  
1006 **Question:** What city's population is 6,690,432?  
1007 **Answer:** Dalian  
1008 **Issue:** The question lacks a specified time period, making the answer potentially outdated.  
1009 Additionally, there is no country constraint, which may lead to ambiguity.
- 1010 • **ID: FreebaseQA-eval-836**  
1011 **Question:** Who is currently the creative director at the house of Chanel?  
1012 **Answer:** Karl Lagerfeld  
1013 **Issue:** Karl Lagerfeld passed away in 2019 and no longer holds this position.
- 1014 • **ID: ComplexQuestions-33**  
1015 **Question:** Who is Greece's leader now?  
1016 **Answer:** Karolos Papoulias  
1017 **Issue:** The answer is outdated; Karolos Papoulias served as president until 2015. The correct  
1018 answer should be the current leader.
- 1019 • **ID: MetaQA-46**  
1020 **Question:** What were the release dates of films directed by the director of [Rosemary's  
1021 Baby]?  
1022 **Answer:** 1986, 1948, 1992, 1982, 1994, 1979, 1999, 1965, 1974, 1967, 1971, 2002, 1988,  
1023 2005, 1976, 2011, 2010, 2013  
1024 **Issue:** The answer is incomplete and outdated; it does not include the director's most recent  
1025 films, such as a 2023 release.

1026 **Incomplete annotations.** Incomplete annotations occur when the gold set omits other valid answers,  
1027 penalizing models that provide equally correct alternatives.

- 1028 • **ID: GrailQA-2100689004000**  
1029 **Question:** What fossil specimen dates from the Eocene?  
1030 **Answer:** Darwinius masillae  
1031 **Issue:** The annotation is incomplete; many Eocene fossils (e.g., Moeritherium lyonsi) would  
1032 also be valid answers.
- 1033 • **ID: DynamicKGQA-14927**  
1034 **Question:** Which American professor at the University of Wisconsin–Madison worked in  
1035 the same city where Charles V. Bardeen died?  
1036 **Answer:** E. Ray Stevens  
1037 **Issue:** The annotation is incomplete; any American professor at UW–Madison would satisfy  
1038 the condition, not just E. Ray Stevens.
- 1039 • **ID: DynamicKGQA-24330**  
1040 **Question:** Which athlete from Novosibirsk shares their nationality with the owner of the  
1041 United Shipbuilding Corporation?  
1042 **Answer:** Yevgeni Nikolayevich Andreyev  
1043 **Issue:** The annotation is incomplete; multiple Russian athletes from Novosibirsk could be  
1044 correct.
- 1045 • **ID: GraphQuestions-281000202**  
1046 **Question:** The British coat of arms has which heraldic supporters included?  
1047 **Answer:** Lion  
1048 **Issue:** The annotation is incomplete; both a lion (left) and a unicorn (right) are supporters.  
1049 Only listing "lion" is insufficient.
- 1050 • **ID: KQAPro-72547**  
1051 **Question:** What person has a notable work titled "The Scorpion King," which was produced  
1052 by Vince McMahon?

1053       **Answer:** Dwayne Johnson  
 1054       **Issue:** Incomplete annotation; any individual involved in the production could be considered  
 1055       correct, not just Dwayne Johnson.

## 1056   **C.1.2   Low-Quality or Ambiguous Questions**

1057   Low-quality questions include those that are ambiguous, overly simple, or fundamentally unanswer-  
 1058   able. We highlight key cases by dataset.

1059   **Ambiguous phrasing.**   Ambiguous questions make it unclear what the intended answer should be,  
 1060   undermining evaluation objectivity.

- 1061       • **ID: CWQ-80\_3dafd01d90b628c5913e0c64c1143354**  
 1062       **Question:** Who inspired the famous person who went to Willem II College?  
 1063       **Answer:** Eugène Delacroix, Claude Monet, Jean-François Millet, Jozef Israëls, etc.  
 1064       **Issue:** The query is open-ended; it does not specify which famous person.
- 1065       • **ID: GrailQAPLus-2101990009000**  
 1066       **Question:** Which automotive designer designed NA?  
 1067       **Answer:** Koichi Hayashi, Tom Matano, Bob Hall  
 1068       **Issue:** The meaning of “NA” is ambiguous and could refer to multiple models or entities.
- 1069       • **ID: GraphQuestions-358000401**  
 1070       **Question:** sci came after what video game engine?  
 1071       **Answer:** Adventure Game Interpreter  
 1072       **Issue:** The question is ambiguous as “sci” does not have a defined meaning or Wikidata  
 1073       label.
- 1074       • **ID: GrailQA-3200295001000**  
 1075       **Question:** What is the number of theater plays that are in mystery?  
 1076       **Answer:** 1  
 1077       **Issue:** The question is too vague and does not provide enough context to determine the  
 1078       correct answer.
- 1079       • **ID: WebQTest-108**  
 1080       **Question:** What was the book written by Charles Darwin?  
 1081       **Answer (length: 153, unique: 94):** On evolution, The Autobiography of Charles Darwin,  
 1082       The Voyage of the Beagle, The Origin of Species, ...  
 1083       **Issue:** The question is ambiguous—Darwin wrote many books, but the prompt refers to  
 1084       “the” book. The ground truth annotation is also excessively broad and noisy, containing 153  
 1085       answers (including duplicates), which undermines reliable evaluation.

1086   **Low-complexity questions.**   Low-complexity questions can be solved by simple lookup or direct  
 1087   retrieval, offering little test of reasoning or multi-hop capabilities.

- 1088       • **ID: QALD9Plus-143**  
 1089       **Question:** What is the area code of Berlin?  
 1090       **Answer:** 030  
 1091       **Issue:** This is a straightforward 1-hop fact lookup with no reasoning required.
- 1092       • **ID: FreebaseQA-eval-1536**  
 1093       **Question:** Who wrote the 1970 book ‘Future Shock’?  
 1094       **Answer:** Alvin Toffler  
 1095       **Issue:** This is a basic factoid query that tests only surface-level knowledge.
- 1096       • **ID: FreebaseQA-eval-2363**  
 1097       **Question:** In which ocean is the island of Madeira?  
 1098       **Answer:** Atlantic Ocean  
 1099       **Issue:** This is a simple fact lookup with no reasoning challenge.
- 1100       • **ID: CWQ-848\_ac67410188d0f2258139a3c84773885e**  
 1101       **Question:** What is the time zone in the location where the time zone is Central Western?  
 1102       **Answer:** Parliamentary system, Constitutional monarchy, Federal monarchy  
 1103       **Issue:** The question is self-answering, non-informative, and offers little reasoning challenge.



- 1104 • **ID: CSQA-7**  
1105 **Question:** Which sex does Wolfgang Brandstetter belong to?  
1106 **Answer:** male  
1107 **Issue:** This is a 1-hop lookup question with no requirement for reasoning ability.
- 1108 • **ID: SimpleDBpedia-17597**  
1109 **Question:** What was Karl Dönitz's place of death?  
1110 **Answer:** Schleswig Holstein  
1111 **Issue:** This is a simple factual retrieval, requiring no reasoning.
- 1112 **Unanswerable, subjective, or ill-formed questions.** Such questions may rest on false premises,  
1113 omit crucial context, or rely on subjective interpretations.
- 1114 • **ID: CWQ-2621\_7360e892294860c6ef7ad9a10e540e1b**  
1115 **Question:** Which author wrote editions of "Notes from My Travels 's husband"?  
1116 **Answer:** Brad Pitt  
1117 **Issue:** The question is ill-formed and refers to a non-existent book.
- 1118 • **ID: CWQ-1304\_f0c99f377c8b944364e85b70b9f9b331**  
1119 **Question:** Which education institution is Bundesrealgymnasium Linz the leader of?  
1120 **Answer:** Hitler Youth, Gestapo, Nazi Party, etc.  
1121 **Issue:** Ill-formed query; Bundesrealgymnasium Linz is itself an educational institution, not  
1122 a leader of other entities.
- 1123 • **ID: GrailQA-2104467004000**  
1124 **Question:** The time zone from UTC of 12.75 has been offset what number of times?  
1125 **Answer:** 1  
1126 **Issue:** The question is uninterpretable; UTC+12.75 is not a standard offset, and the phrasing  
1127 lacks clarity.
- 1128 • **ID: QALD9Plus-81**  
1129 **Question:** Butch Otter is the governor of which U.S. state?  
1130 **Answer:** [Missing Ground Truth]  
1131 **Issue:** Unanswerable in the present; Butch Otter no longer holds that position.
- 1132 • **ID: FreebaseQA-eval-3290**  
1133 **Question:** What is measured in Scoville units?  
1134 **Answer:** Pungency  
1135 **Issue:** Subjective; the question could accept "spiciness" or "pungency," but only one is  
1136 annotated as correct.
- 1137 • **ID: GraphQuestions-462000201**  
1138 **Question:** Find the bearers of the coat of arms granted by queen.  
1139 **Answer:** Western Australia  
1140 **Issue:** The question does not specify which queen or which coat of arms, making it  
1141 ambiguous and unanswerable.
- 1142 • **ID: KQAPro-3**  
1143 **Question:** Which has lower elevation above sea level, Bristol or Jerusalem whose ISNI is  
1144 0000 0001 2158 6491?  
1145 **Answer:** Bristol  
1146 **Issue:** Problematic: the Jerusalem referenced is a musician, not a location. Multiple cities  
1147 named Bristol exist, with no way to determine which is intended.

## 1148 C.2 Limitations of Exact-Match Evaluation

1149 Existing KGQA benchmarks are further limited by their reliance on rigid exact-match evaluation  
1150 protocols. Such criteria do not accommodate semantically correct answers that are phrased differently  
1151 from the annotated ground truth. As a result, models are often penalized for generating correct  
1152 answers that differ only in surface form, leading to false negatives and an underestimation of true  
1153 model performance.

- 1154 • **ID: QALD9-174**  
1155 **Question:** Who is the novelist of the work a song of ice and fire?

1156 **Ground Truth:** George\_R.\_R.\_Martin  
 1157 **Issue:** Other semantically correct forms such as "George Raymond Richard Martin,"  
 1158 "George R. R. Martin" (with or without punctuation), "G. R. R. Martin," "George RR  
 1159 Martin," "Martin, George R. R.," "George R. Martin," or "G.R.R. Martin" are equally valid.  
 1160 Exact-match evaluation penalizes correct answers that differ in surface form or formatting.

- 1161 • **ID: QALD9-114**  
 1162 **Question:** How big is the earth's diameter?  
 1163 **Ground Truth:** 1.2742e+07  
 1164 **Issue:** Acceptable answers include "12,742 km," "12,742,000 meters," "about 7,918 miles,"  
 1165 "1.2742  $\times 10^7$  meters," and "approximately 12,700 kilometers." Variations in units, notation,  
 1166 or approximation are all reasonable, but exact match evaluation may reject them as incorrect.
- 1167 • **ID: CSQA-60**  
 1168 **Question:** Which nucleic acid sequence encodes Ufm1-specific protease 2?  
 1169 **Ground Truth:** Ufsp2  
 1170 **Issue:** Other valid forms include "Ufsp2 gene," "the gene encoding Ufm1-specific protease  
 1171 2," "gene symbol: UFSP2," or Ensembl/NCBI identifiers. Exact match allows only the  
 1172 annotated form, penalizing equally correct alternatives.
- 1173 • **ID: WebQTest-6**  
 1174 **Question:** Where is JaMarcus Russell from?  
 1175 **Ground Truth:** Mobile  
 1176 **Issue:** Answers such as "Mobile, Alabama," "the city of Mobile," "Mobile (city)," "Mobile,  
 1177 AL," or "JaMarcus Russell was born in Mobile, Alabama" all convey the same information,  
 1178 but may not be accepted unless they match the ground truth exactly.
- 1179 • **ID: FreebaseQA-eval-607**  
 1180 **Question:** Who wrote the 1990 Booker Prize winner Possession?  
 1181 **Ground Truth:** a. s. byatt  
 1182 **Issue:** Other correct answers like "Antonia Susan Byatt," "Dame A. S. Byatt," or "Antonia  
 1183 Byatt" are semantically equivalent, but only the annotated form is accepted under exact  
 1184 match.

## 1185 D Prompt Templates and Generation Examples

1186 This section provides detailed documentation of the prompt templates used in KGQAGen, along with  
 1187 representative examples of generated questions and error cases. We first present the core generator  
 1188 prompt that guides question construction and knowledge sufficiency checking. We then describe the  
 1189 simplified evaluator prompt used during answer validation. Finally, we analyze example outputs and  
 1190 common error patterns to illustrate the framework's capabilities and limitations.

### 1191 D.1 Question Generation Prompt

1192 The generator component of KGQAGen utilizes a carefully designed prompt template to ensure high-  
 1193 quality question generation. The prompt consists of input specifications and structured generation  
 1194 rules that guide the LLM in producing well-formed question-answer instances.

1195 The input format specifies RDF triples from Wikidata, where each triple contains an entity label with  
 1196 its Q-ID, a predicate label with its P-ID, and another entity label with Q-ID. The LLM evaluates  
 1197 whether the given subgraph provides sufficient information for generating a meaningful KGQA  
 1198 instance. The generation rules enforce five key requirements for question construction. (1) Reasoning  
 1199 complexity demands that generated questions involve at least 2-hop logical reasoning paths. The  
 1200 framework prioritizes specific, instance-level entities while avoiding generic categories. Factual  
 1201 constraints are incorporated only when necessary for disambiguation or meaningful answer space  
 1202 reduction. (2) Entity selection criteria require that candidate entities must be concrete instances  
 1203 rather than abstract types. The system favors entities that enable meaningful multi-hop paths through  
 1204 affiliations, awards, locations, or temporal relationships, while avoiding generic class-level concepts.  
 1205 (3) Question difficulty ensures that questions are designed to require structured knowledge graph  
 1206 reasoning by incorporating inverse relations, numerical constraints, comparative logic, or set-based  
 1207 conditions. The framework employs factual filters to reduce ambiguity and ensures questions cannot  
 1208 be answered through general knowledge alone. (4) Natural language quality mandates that questions

1209 must use natural, fluent phrasing typical of real user queries. The prompt enforces self-contained and  
 1210 concise formulation while avoiding references to underlying data structures or unnecessary repetition.  
 1211 (5) Semantic clarity requires that all generated questions must unambiguously specify their intended  
 1212 answers. The prompt explicitly prohibits vague or underspecified formulations that could lead to  
 1213 multiple valid interpretations.

1214 The LLM returns a JSON response indicating either insufficiency with candidate entities for expansion  
 1215 or a complete question-answer instance containing the natural language question, answer set,  
 1216 supporting proof triples, and corresponding logical constraints. The full prompt template is provided  
 1217 below:

#### Prompt

```
You are given a small set of RDF triples from Wikidata.
Format: Each triple is a 3-item array: ["<label> (<Q-ID>)", "<predicate> (<P-ID>)", "<label> (<Q-ID>)"]
Triples: {triples}
Your task is to determine whether this subgraph is sufficient to support a
challenging and non-trivial question for a knowledge graph question answering
(KGQA) benchmark.
Guidelines:
1. Reasoning Depth
    • Prefer questions requiring at least 2-hop reasoning.
    • Avoid generic topics or subclass chains-focus on instance-level,
      specific entities.
    • Use factual constraints (e.g., date, affiliation) only when needed to
      disambiguate the answer or add meaningful specificity.
    • Do not over-constrain-include only what is necessary to yield a specific
      answer.
2. Entity Selection and Expansion
    • Focus on concrete, instance-level entities (e.g., Q7186), not types like
      Q5 (human) or Q11424 (film).
    • Avoid generic classes like "scientist", "award", or "event", and
      relations like "subclass of" or "instance of".
    • Prefer entities and paths supporting deeper reasoning-e.g., affiliations,
      recognitions, or spatiotemporal links.
3. Difficulty
    • Encourage inverse relations, comparative logic, date/number filters, or
      set membership.
    • Ensure the answer cannot be derived from general knowledge alone.
    • The subgraph must contain all supporting information to answer the
      question.
4. Naturalness
    • Phrase the question as a fluent, self-contained query a user might ask.
    • Avoid references to the input format (e.g., "triples", "given data").
    • Do not use phrases like:
      - "from the given data"
      - "among these entities"
      - "listed here"
5. Clarity
    • The question must be unambiguous and logically imply a unique, specific
      answer.
    • Avoid vague or underspecified language.
```

1218

Output Format:  
 If the graph is not sufficient, return: { "sufficient": false, "candidate": [
 If sufficient, return: { "sufficient": true, "question": "<natural-language question>", "answer": ["<answer-label (QID)>", "..."], "proof": [ ["<label (QID)>", "<predicate (PID)>", "<label (QID)>"], ... ] }  
 Return strict JSON only - no commentary.

1219

### Few-shot Example

Example 1: Triples: [ ["Johann Martin Schleyer (Q12712)", "nominated for (P1411)", "Nobel Peace Prize (Q35637)"], ["International Volapöck Academy (Q3358168)", "founded by (P112)", "Johann Martin Schleyer (Q12712)"], ["Johann Martin Schleyer (Q12712)", "place of birth (P19)", "Oberlauda (Q885402)"] ]  
 Output: { "sufficient": true, "question": "Who among the nominees for the Nobel Peace Prize was also the founder of International Volapöck Academy?", "answer": ["Johann Martin Schleyer (Q12712)"], "proof": [ ["Johann Martin Schleyer (Q12712)", "nominated for (P1411)", "Nobel Peace Prize (Q35637)"], ["International Volapöck Academy (Q3358168)", "founded by (P112)", "Johann Martin Schleyer (Q12712)"] ] }

Example 2: Triples: [ ["Karakalpakstan (Q484245)", "capital (P36)", "Nukus (Q489898)"], ["Karakalpakstan (Q484245)", "shares border with (P47)", "Mangystau Region (Q238931)"], ["Karakalpakstan (Q484245)", "official language (P37)", "Karakalpak (Q33541)"], ["Karakalpakstan (Q484245)", "country (P17)", "Uzbekistan (Q265)"] ]  
 Output: { "sufficient": false, "candidate": ["Q33541", "Q489898", "Q238931"] }

Example 3: Triples: [ ["Astronomy and Astrophysics (Q752075)", "publisher (P123)", "EDP Sciences (Q114404)"], ["Astronomy and Astrophysics (Q752075)", "editor (P98)", "Thierry Forveille (Q46260676)"], ["Zeitschrift für Astrophysik (Q3575110)", "followed by (P156)", "Astronomy and Astrophysics (Q752075)"] ]  
 Output: { "sufficient": true, "question": "What astronomical journal, published by EDP Sciences and edited by Thierry Forveille, succeeded Zeitschrift für Astrophysik as its immediate follower?", "answer": ["Astronomy and Astrophysics (Q752075)"], "proof": [ ["Astronomy and Astrophysics (Q752075)", "publisher (P123)", "EDP Sciences (Q114404)"], ["Astronomy and Astrophysics (Q752075)", "editor (P98)", "Thierry Forveille (Q46260676)"], ["Zeitschrift für Astrophysik (Q3575110)", "followed by (P156)", "Astronomy and Astrophysics (Q752075)"] ] }

1220

1221 This structured prompt design ensures consistent generation of high-quality, diverse, and well-  
 1222 specified question-answer pairs for the benchmark dataset. The prompt template balances multiple  
 1223 objectives: maintaining reasoning complexity, ensuring natural language quality, and guaranteeing  
 1224 answer specificity. By enforcing these requirements through explicit rules and format specifications,  
 1225 we enable systematic generation of challenging yet well-formed KGQA instances.

## 1226 D.2 SPARQL Validation Prompt

1227 The validation component uses a focused prompt template for verifying and refining SPARQL queries.  
 1228 This streamlined prompt specifically addresses query correction when execution results differ from  
 1229 intended answers, ensuring both syntactic correctness and semantic alignment.

1230 The validation process operates on the principle of iterative refinement. When a generated SPARQL  
 1231 query fails to return expected results or returns empty result sets, the validation component engages a  
 1232 lightweight language model to diagnose and correct the query. This approach recognizes that initial  
 1233 query generation may suffer from syntactic errors, incorrect entity identifiers, or inappropriate query  
 1234 structure that prevents successful execution against the Wikidata endpoint.

1235 The prompt template emphasizes simplicity and executability in query revision. Rather than attempt-  
 1236 ing complex query transformations, the validation component focuses on ensuring that revised queries  
 1237 use only essential triple patterns and avoid unnecessary complexity that might introduce additional

1238 failure points. The template specifically discourages the use of optional clauses and filter conditions  
 1239 unless they are strictly necessary for answering the question, as these constructs often lead to query  
 1240 execution failures or unexpected empty results. Additionally, the validation process enforces struc-  
 1241 tural requirements that ensure compatibility with the Wikidata query service. All revised queries must  
 1242 terminate with a single SERVICE wikibase:label clause to retrieve human-readable English labels  
 1243 for entities, maintaining consistency with the expected output format. The prompt also mandates  
 1244 syntactic validity and direct executability at the official Wikidata SPARQL endpoint, ensuring that  
 1245 corrected queries can be verified immediately. The output format maintains strict JSON formatting  
 1246 requirements to facilitate automated processing. The validation component returns only the corrected  
 1247 SPARQL query without additional commentary or explanation, enabling seamless integration into  
 1248 the broader validation pipeline. This focused approach allows for rapid iteration and correction when  
 1249 initial query generation produces non-executable or semantically misaligned queries.

1250 Through this validation mechanism, KGQAGen ensures that all retained question-answer pairs are  
 1251 grounded in verifiable SPARQL queries that can be executed against the knowledge base. This  
 1252 constraint provides a strong guarantee of answer correctness and enables ongoing validation as the  
 1253 underlying knowledge graph evolves over time.

#### Prompt

```
You are given a SPARQL query over Wikidata that returned no results.
Question: {question}
Original SPARQL: {sparql}
Your task is to revise the query so that it returns valid results from Wikidata.
Revision Guidelines:
• Use only essential triple patterns. Avoid OPTIONAL and FILTER clauses unless
  strictly necessary.
• The query must end with a single SERVICE wikibase:label clause to retrieve
  English labels.
• Ensure the query is syntactically valid and directly executable at https://query.wikidata.org.
Output Format: Return a single JSON object in the exact format below - no
commentary, no markdown:
{
  "correct_sparql": "<REVISED SPARQL QUERY HERE>"
}
```

1254

1255 This structured prompt design ensures consistent generation of high-quality, diverse, and well-  
 1256 specified question-answer pairs for the benchmark dataset. The prompt template balances multiple  
 1257 objectives by maintaining reasoning complexity, ensuring natural language quality, and guaranteeing  
 1258 answer specificity. By enforcing these requirements through explicit rules and format specifications,  
 1259 we enable systematic generation of challenging yet well-formed KGQA instances.

## 1260 E A Case Study of KGQAGen-10k

1261 An audit of 300 randomly sampled question-answer pairs from the entire 10,787-instance  
 1262 KGQAGen-10k revealed 11 defective cases shown Table 4, a rate of error of 3.6%. Although this  
 1263 figure is relatively low, these instances expose recurring weaknesses in the generation and verification  
 1264 pipeline that warrant attention. The issues fall into three broad categories: self-answering prompts,  
 1265 hallucinated or incomplete relations, and errors inherited from the source knowledge graph.

1266 The first issue, **self-answering questions**, was evident in items 4555 and 6931, where the question  
 1267 text directly includes the target answer. For example, asking about a subclass that 'has the same  
 1268 meaning as the English-language word 'city' leaves little ambiguity about the expected answer.  
 1269 Because our current verification process only checks that the SPARQL query returns at least one  
 1270 result overlapping the proposed answer set, it overlooks this form of lexical leakage and accepts the  
 1271 examples as valid.

1272 The second and more prevalent category involves **hallucinated or incomplete knowledge**. In six  
 1273 cases (IDs 8318, 1105, 1164, 1529, 1825, and 10469), the model generated questions based on  
 1274 nonexistent or incoherent relationships, such as attributing architectural roles to historical political

1275 figures. In these situations, the LLM still produces syntactically valid queries, sometimes by leverag-  
1276 ing loosely related property paths, allowing the verifier’s overlap check to pass despite clear semantic  
1277 errors. In a complementary failure mode, item 2297 exemplifies incomplete annotations: While  
1278 multiple mathematicians satisfy the described criteria, only one is listed in the answer set. Since the  
1279 verifier stops when it finds a match, it does not detect incompleteness.

1280 A third source of error originates not from the generation process but from the **underlying knowledge**  
1281 **graph itself in Wikidata [61]**. Items 9572 and 2046 illustrate this point: one references an entity  
1282 mistyped as a product, the other includes an unlabeled identifier. Our pipeline implicitly treats  
1283 Wikidata typing and labeling as authoritative, so these issues remain undetected unless caught during  
1284 manual review.

1285 The major cause of these verification failures lies in the limited scope of the current safeguard. The  
1286 answer verification and refinement (detailed in Section 4.3) of our KGQAGen checks are whether the  
1287 SPARQL query compiles and whether its result set overlaps the proposed answer. Although effective  
1288 in filtering out broken or irrelevant queries, this approach does not account for key semantic and  
1289 structural issues. It does not detect leakage of lexical answers, does not require precise predicate  
1290 alignment, does not check the joint coherence of query constraints, and does not validate type or label  
1291 accuracy within the knowledge graph.

1292 To address these gaps and further improve the quality of the data set beyond the current validation  
1293 rate of 96.3%, we plan a series of targeted upgrades. First, we will implement a lexical filter to  
1294 reject questions that contain their own answers. Second, we will enforce stricter predicate and type  
1295 constraints within the generated queries to check against hallucinated relations. Third, we will  
1296 introduce answer completeness audits through closure tests that ensure the full set of valid answers is  
1297 captured. Finally, we will cross-check critical entity labels and types against alternative KG snapshots  
1298 to catch inconsistencies and improve robustness across knowledge versions.

Table 4: KGQAGen-10k Error Analysis: Each case is displayed with concise issue diagnosis.

| Field           | Content                                                                                                                                                                                                                                          |
|-----------------|--------------------------------------------------------------------------------------------------------------------------------------------------------------------------------------------------------------------------------------------------|
| <b>ID</b>       | 4555                                                                                                                                                                                                                                             |
| <b>Question</b> | What subclass of 'city or town' has both a GND ID and is identified as the same concept as the English-language word 'city'?                                                                                                                     |
| <b>Answer</b>   | city                                                                                                                                                                                                                                             |
| <b>Issue</b>    | <b>Self-answering:</b> The question is trivial; the answer is explicitly stated in the question itself.                                                                                                                                          |
| <b>ID</b>       | 8318                                                                                                                                                                                                                                             |
| <b>Question</b> | Who is the architect of Estadio Nacional de Costa Rica that was also a successful candidate in multiple Costa Rican general elections?                                                                                                           |
| <b>Answer</b>   | Ricardo Jiménez Oreamuno                                                                                                                                                                                                                         |
| <b>Issue</b>    | <b>Hallucinated knowledge:</b> The question implies an architect relationship that does not exist; Ricardo Jiménez Oreamuno was a politician, not an architect.                                                                                  |
| <b>ID</b>       | 1105                                                                                                                                                                                                                                             |
| <b>Question</b> | Which person who has been an owner of the Shroud of Turin is not a human individual, but rather a dynastic house?                                                                                                                                |
| <b>Answer</b>   | Geoffroi de Charny, House of Savoy, Jeanne de Vergy, pope                                                                                                                                                                                        |
| <b>Issue</b>    | <b>Hallucinated knowledge:</b> Geoffroi de Charny and House of Savoy are individuals, not dynastic houses.                                                                                                                                       |
| <b>ID</b>       | 1164                                                                                                                                                                                                                                             |
| <b>Question</b> | Which person, who held citizenship in the Ming, Qing, and short-lived Zhou dynasties, was both the father of Wu Yingxiong and the spouse of both Chen Yuanyuan and Empress Zhang, and led a revolt known as the Revolt of the Three Feudatories? |
| <b>Answer</b>   | Kangxi Emperor, Kingdom of Tungning, Qing dynasty, Wu Sangui, Zheng Jing                                                                                                                                                                         |
| <b>Issue</b>    | <b>Hallucinated knowledge:</b> Zheng Jing is not the spouse of Chen Yuanyuan.                                                                                                                                                                    |
| <b>ID</b>       | 2297                                                                                                                                                                                                                                             |
| <b>Question</b> | Which mathematician both lent his name to the principle maintained by WikiProject Mathematics and is explicitly named as its discoverer or inventor?                                                                                             |
| <b>Answer</b>   | Johann Peter Gustav Lejeune Dirichlet                                                                                                                                                                                                            |
| <b>Issue</b>    | <b>Hallucinated knowledge:</b> Many mathematicians have principles named after them; the annotation is incomplete and not unique.                                                                                                                |
| <b>ID</b>       | 1825                                                                                                                                                                                                                                             |
| <b>Question</b> | Which concept, characterized as 'unusual', is named after 'unusual', is the main subject of an entity named after 'unusual', and is also cited as a partially coincident concept by 'rarity'?                                                    |
| <b>Answer</b>   | frequency, scarcity, unusual                                                                                                                                                                                                                     |
| <b>Issue</b>    | <b>Hallucinated knowledge:</b> None of the ground truths are the subject of "World's Weirdest Animals". Its main subject is "creature".                                                                                                          |
| <b>ID</b>       | 10469                                                                                                                                                                                                                                            |
| <b>Question</b> | Which musical artist is associated with the genre that is said to be the same as "vintage" and has also performed in the genre represented by 'retro style'?                                                                                     |
| <b>Answer</b>   | Adam Tsarouchis, Ahmad Bersaudara, Anna Jantar, Gloomwood, Nina Shatskaya, Type-B, VCTR-SCTR, Wieczór na dworcu w Kansas City                                                                                                                    |
| <b>Issue</b>    | <b>Hallucinated knowledge:</b> Wieczór na dworcu w Kansas City is not a musical artist, but a retro style song.                                                                                                                                  |
| <b>ID</b>       | 1529                                                                                                                                                                                                                                             |
| <b>Question</b> | Which artist created a work that depicts the astronomical event discovered by Pierre Gassendi, and has as its main subject the transit of Mercury?                                                                                               |
| <b>Answer</b>   | Mercury Passing Before the Sun                                                                                                                                                                                                                   |
| <b>Issue</b>    | <b>Hallucinated knowledge:</b> Mercury Passing Before the Sun is the artwork, not the artist. The artist is Giacomo Balla.                                                                                                                       |
| <b>ID</b>       | 6931                                                                                                                                                                                                                                             |
| <b>Question</b> | Which type of underwater vehicle is classified as both a subclass of submersible and shares this property with bathyscaphe, narco-submarine, and Osprey-class submersible?                                                                       |
| <b>Answer</b>   | Osprey-class submersible, bathyscaphe, bathysphere, narco-submarine, submersible drilling rig                                                                                                                                                    |
| <b>Issue</b>    | <b>Self-answering:</b> The answer is trivially the same as the question's subject; provides no substantive challenge.                                                                                                                            |
| <b>ID</b>       | 9572                                                                                                                                                                                                                                             |
| <b>Question</b> | Which company has produced a product used for flow measurement that includes a flow meter as a part?                                                                                                                                             |
| <b>Answer</b>   | Sage Metering                                                                                                                                                                                                                                    |
| <b>Issue</b>    | <b>Wikidata Mismatch:</b> The product of Sage Metering is labelled as "flow measurement" on Wikidata, but "flow measurement" is a task, not a product.                                                                                           |
| <b>ID</b>       | 2046                                                                                                                                                                                                                                             |
| <b>Question</b> | Which tool that is a subclass of both 'physical tool' and is connected with 'level staff', is in turn a subclass of something that has the shape of a cylinder and is different from 'Rod'?                                                      |
| <b>Answer</b>   | "Q9397141"                                                                                                                                                                                                                                       |
| <b>Issue</b>    | <b>Wikidata Mismatch:</b> The entity "Q9397141" doesn't contain the natural language label.                                                                                                                                                      |



## 1299 F Experimental Details

1300 This section provides comprehensive details about our experimental setup, including model configu-  
1301 rations, training protocols, and evaluation procedures.

### 1302 F.1 Model Specifications

1303 We evaluate three categories of models on KGQAGen-10k: (1) **Pure Language Models**, (2) **KG-RAG**  
1304 **Systems**, and (3) **LLMs with Supporting Graphs**. These categories reflect increasing levels of  
1305 external knowledge integration, ranging from purely parametric reasoning to symbolic augmentation  
1306 and perfect-evidence setups.

1307 **Pure Language Models** These models rely entirely on their internal parametric memory and are  
1308 evaluated in a zero-shot setting, without any KG subgraph or retrieval. Their performance reflects  
1309 inherent reasoning capability, factual coverage, and generalization.

- 1310 • **LLaMA-3.1-8B-Instruct** [19]: An 8B instruction-tuned model from Meta’s LLaMA 3.1  
1311 series. It is optimized for following task-specific instructions and shows improved reasoning  
1312 performance compared to earlier LLaMA versions.
- 1313 • **LLaMA2-7B** [59]: A general-purpose 7B model trained on publicly available data, serving  
1314 as a foundational open-weight baseline for reasoning without instruction tuning.
- 1315 • **Mistral-7B-Instruct-v0.2** [2]: An instruction-following model based on Mistral-7B with  
1316 a 32k context window and standard attention. It is designed for accurate and efficient  
1317 long-context reasoning.
- 1318 • **GPT-4o-mini** [1]: A compact version of GPT-4o offering reduced latency and strong  
1319 language understanding performance, suitable for real-time applications.
- 1320 • **GPT-4** [1]: OpenAI’s flagship model known for robust multi-step reasoning, long-context  
1321 understanding, and generalization across a wide array of tasks.
- 1322 • **DeepSeek-Chat** [11]: A dialogue-oriented LLM developed by DeepSeek and fine-tuned for  
1323 task completion and conversational fluency aligned with human feedback.
- 1324 • **GPT-4o** [1]: A unified multimodal model capable of handling text, image, and audio inputs.  
1325 We use it in a text-only setup to assess its advanced reasoning capabilities.
- 1326 • **GPT-4.1** [39]: An updated variant of GPT-4 that improves long-context performance, factual  
1327 grounding, and consistency in complex prompt execution.

1328 **KG-RAG Systems** Knowledge Graph Retrieval-Augmented Generation (KG-RAG) systems incor-  
1329 porate structured symbolic evidence from a KG to assist reasoning and answer generation. These  
1330 models access retrieved subgraphs at runtime and vary in how they integrate retrieved content—either  
1331 as conditioning input or through decoding constraints.

- 1332 • **RoG (LLaMA2-7B)** [32]: Fine-tuned on KGQAGen-10k’s training split, using annotated sup-  
1333 porting subgraphs to supervise faithful reasoning path generation for answer and explanation  
1334 prediction.
- 1335 • **GCR (LLaMA-3.1 + GPT-4o)** [33]: Fine-tuned its path generation module with supporting  
1336 subgraphs, leveraging a KG-Trie to constrain decoding and using GPT-4o for final answer  
1337 synthesis.
- 1338 • **ToG (GPT-4o)** [55]: Adapted to Wikidata by replacing Freebase API calls with SPARQL  
1339 queries and evaluated zero-shot, interactively exploring the KG and generating answers  
1340 from the retrieved subgraph without fine-tuning or parameter adjustment.
- 1341 • **PoG (GPT-4o)** [9]: Applied as a zero-shot prompting-based agent that dynamically de-  
1342 composes, explores, and self-corrects over Wikidata for each test question, without any  
1343 dataset-specific fine-tuning.

**LLM with Supporting Subgraph** To estimate the upper bound of KG-augmented QA performance, we provide models with the gold supporting subgraph used during data generation. This simulates a perfect-retrieval setting, where the model receives all and only the minimal evidence needed to answer correctly. These experiments assess whether models can effectively reason over structured KG input when retrieval is assumed to be ideal.

- **LLaMA2-7B (w/ SP)** [59]: The model is provided with the gold subgraph and asked to generate the answer. This tests the reasoning capacity of a smaller open-weight model under ideal symbolic input.
- **GPT-4o (w/ SP)** [1]: The same setup as above, but with GPT-4o as the base model. This configuration reflects an upper-bound for KG-RAG systems when both retrieval and reasoning are ideal.

## F.2 Beyond Exact Match: Introducing LASM

While the limitations of exact match evaluation in KGQA are well-recognized [48, 62], few works have proposed principled solutions. To address this gap, we introduce LLM-Assisted Semantic Match (LASM), a novel evaluation scheme that goes beyond surface-level equivalence by leveraging the semantic understanding capabilities of large language models.

The core idea of LASM is to use an LLM verifier to assess semantic similarity between predicted and ground truth answers. When a model’s prediction fails the exact string match, LASM invokes a GPT-4o-mini judge to determine whether the prediction is semantically equivalent to the gold answer. This approach enables LASM to properly credit models for generating meaningfully correct responses that traditional metrics would overlook due to syntactic or lexical variation. To quantify the impact of LASM, we compare model performance on the FreebaseQA dataset [23] under both exact match and LASM evaluation. As shown in Table 5, LASM yields substantial improvements across all key metrics, including accuracy (+5.3%), Hit@1 (+5.3%), and F1 (+5.0%). These gains demonstrate the effectiveness of semantic matching in capturing valid model predictions that exact match misses.

| Scoring     | Accuracy | Hit@1 | F1    | Precision | Recall |
|-------------|----------|-------|-------|-----------|--------|
| Exact Match | 90.39    | 90.39 | 88.08 | 87.08     | 90.39  |
| LASM        | 95.72    | 95.67 | 93.12 | 92.04     | 95.65  |

Table 5: FreeBaseQA results with GPT-4o. LASM consistently recovers semantically correct predictions missed by exact match, leading to substantial metric improvements.

Beyond offering a more robust and nuanced assessment of model outputs, LASM has important implications for the development and evaluation of KGQA systems. By rewarding models for semantic correctness rather than rigid string matching, LASM promotes the development of systems that prioritize meaning over surface form. Moreover, as a fully automated method that does not rely on dataset-specific rules or annotations, LASM is readily applicable to any KGQA benchmark, enabling more meaningful cross-dataset comparisons.

In summary, LASM represents a principled and generalizable approach to overcoming the limitations of traditional exact match evaluation in KGQA. By incorporating semantic awareness through LLM-based similarity judgments, LASM provides a more reliable and nuanced assessment of model performance, paving the way for the development of more robust question answering systems. As we will demonstrate through extensive experiments in Section 5, LASM offers a valuable tool for evaluating and advancing the state of the art in KGQA.

## F.3 Experimental Setup

We evaluate all models on KGQAGen-10k using a standardized split of 8,629/1,079/1,079 train/eval/test. For KG-RAG systems, we adapt each model to work with Wikidata by replacing their original knowledge base interfaces with SPARQL queries to the Wikidata endpoint.

**Training and Inference Protocols** RoG [32] employs a planning-retrieval-reasoning pipeline where LLaMA2-7B first generates candidate relation paths, which are then matched against the

1387 knowledge graph using constrained breadth-first search. The retrieved reasoning paths, combined  
1388 with the original question, guide the model to generate both answers and explanations. We fine-tune  
1389 the entire pipeline on our training split, using the supporting subgraphs from dataset construction as  
1390 supervision for faithful path generation.

1391 GCR [33] enforces graph faithfulness through constrained decoding. Prior to inference, we construct  
1392 a KG-Trie index that efficiently captures all valid reasoning paths within a fixed hop limit. During  
1393 generation, a fine-tuned LLaMA-3.1 model produces candidate paths under strict KG-Trie constraints,  
1394 ensuring only valid graph traversals. These candidates are then passed to GPT-4o for inductive  
1395 reasoning and answer synthesis. Similar to RoG, we leverage our supporting subgraphs for training  
1396 the path generation component.

1397 In contrast, ToG [55] and PoG [9] operate without fine-tuning, treating the LLM as an agent that  
1398 interactively explores the knowledge graph. ToG constructs reasoning trees by iteratively selecting  
1399 relations and entities based on question semantics, while PoG enhances this with adaptive planning  
1400 and self-correction mechanisms. For both models, we implement direct Wikidata integration, allowing  
1401 them to dynamically query the knowledge base during inference without dataset-specific training.

1402 **Evaluation Metrics** We evaluate each KGQA system using 4 complementary Hit@1, Precision,  
1403 Recall, and F1—under two answer-matching schemes: Exact Match (EM) and LASM. **EM** considers  
1404 a prediction correct only if the model’s answer set exactly matches the ground-truth set after basic  
1405 normalization, which includes lowercasing and alphabetically sorting answers. This is a strict  
1406 string-level comparison that does not account for synonyms, paraphrases, or other forms of semantic  
1407 equivalence. Hit@1 measures whether the model’s top-ranked answer appears in the ground-truth  
1408 set. Precision, Recall, and F1 capture the degree of set overlap: Precision reflects the proportion of  
1409 predicted answers that are correct, Recall captures the proportion of ground-truth answers that are  
1410 retrieved, and F1 is their harmonic mean—together highlighting whether a model tends to over- or  
1411 under-generate. **LASM** extends this evaluation by replacing literal comparison with a GPT-4o-mini  
1412 verifier that determines whether the predicted and ground-truth answers are semantically equivalent.  
1413 We then recompute all five metrics based on this semantic agreement. This two-tiered protocol offers  
1414 a comprehensive view of model performance, balancing surface-level exactness with meaning-level  
1415 correctness.
